# Supplementary material for: Simulated ocean acidification reveals winners and losers in coastal phytoplankton
Source: PLoS One. 2017 Nov 30;12(11):e0188198. doi: 10.1371/journal.pone.0188198 (PMC5708705; doi:10.1371/journal.pone.0188198)
Supplement: S2 Table — (XLSX) [file pone.0188198.s002.xlsx]

## Sheet: Sheet1
phytoplankton species or group	length (µm)	width (µm)
Amphidinium sphenoides	40	13
Ceratium fusus	300-400	20-30
Ceratium lineatum	100-150	30-40
Ceratium longipes	200-300	50-60
Ceratium tripos	200-350	70-90
cf. Fragilaria sp.	30	5
cf. Peridinella danicus	20	15
Thalassiosira sp.		10
Chaetoceros danicus	10	15
Chaetoceros decipiens	15	20
Ciliophora	>60
Coscinodiscus concinnus		>200
Cylindrotheca sp.	50-150	4
Detonula sp.	30	10
Dinophysis norvegica	50-70	40-50
Dinophysis rotundata	40-55	35-50
Ebria tripartita	25-30	20-25
Gymnodinium cf. aureolum	15	15
Gymnodinium sp.	10	5
Gymnodinium sp.	15-20	10-15
Gymnodinium sp.	15-20	5
Gymnodinium sp.	20-50	15-30
Gymnodinium sp.	>50	>30
Gyrodinium sp.	30	15
Gyrodinium sp.	60	30
Hemiselmis sp.	<10	<4
Heterocapsa rotundata	10-12	5-7
Katodinium sp.	20-30	15-20
Laboea sp.	60-80
Leptocylindrus sp.	30-50	5-7
Licmophora sp.	50-60	40
Lohmanniella sp.	30-40
Melosira sp.	25	15
Navicula cf. transitrans var. delicatula	20	5
Navicula cf. transitrans var. delicatula	40-60	10
Navicula sp.	20	10
Navicula sp.	40-60	20
Protoperidinium bipes	30	20
Protoperidinium brevipes	35	30
Protoperidinium sp.	40-50
Pseudo-Nitzschia sp.	100	5
Pseudo-Nitzschia sp.	60	3
Skeletonema sp.	8	6
Strombidium sp.	30-50
Teleaulax sp.	15	6-7
Thalassionema sp.	70-80	3-5
Tontonia sp.	60-80
Torodinium sp.	40-50	22
