# Supplementary material for: Simulated ocean acidification reveals winners and losers in coastal phytoplankton
Source: PLoS One. 2017 Nov 30;12(11):e0188198. doi: 10.1371/journal.pone.0188198 (PMC5708705; doi:10.1371/journal.pone.0188198)
Supplement: S3 Table — The inorganic nutrient development is was similar in all mesocosms [12] so that the averages shown here include all mesocosms. A graphical representation of the inorganic nutrient dataset as well as the analytical methodology is provided in the overview paper [12] accompanying this study. Phase I = day -2–16; phase II = day 17–40; phase III = day 41–77; phase IV = day 78–111. (XLSX) [file pone.0188198.s003.xlsx]

## Sheet: Sheet1
	NO3- + NO2- (µmol L-1)	Si(OH)4 (µmol L-1)	PO43- (µmol L-1)	NH4+(µmol L-1)
Phase I	6.79 (±0.26)	9.38 (± 0.68)	0.75 (± 0.04)	0.14 (±0.17)
Phase II	3.10 (± 2.72)	4.47 (±2.36)	0.37 (±0.26)	0.05 (±0.06)
Phase III	0.04 (±0.04)	0.55 (±0.53)	0.05 (±0.04)	0.13 (±0.11)
Phase IV	0.04 (±0.03)	0.04 (±0.10)	0.05 (±0.02)	0.09 (±0.09)
